# Supplementary material
Source: MDPI journal article supplement (https://www.mdpi.com/2073-4441/14/4/511)
Supplement: s1 [file s1]

# **Road Runoff characterization: ecotoxicological assessment combined with (non-)target screenings of micropollutants for the identification of relevant toxicants in the dissolved phase**

**Fidji Sandré, Nina Huynh, Marie-Christine Gromaire, Gilles Varrault, Christophe Morin, Régis Moilleron, Julien Le Roux and Laure Garrigue-Antar**

Supplementary material

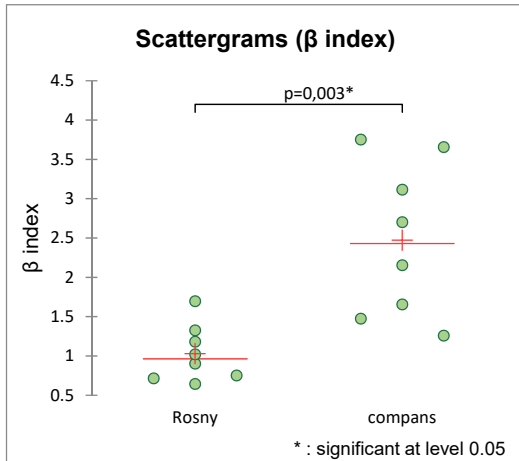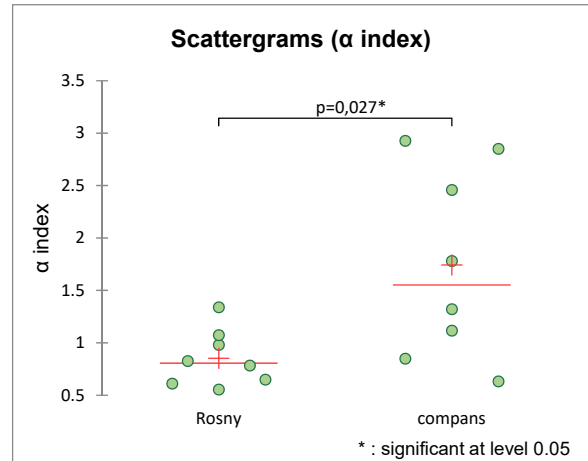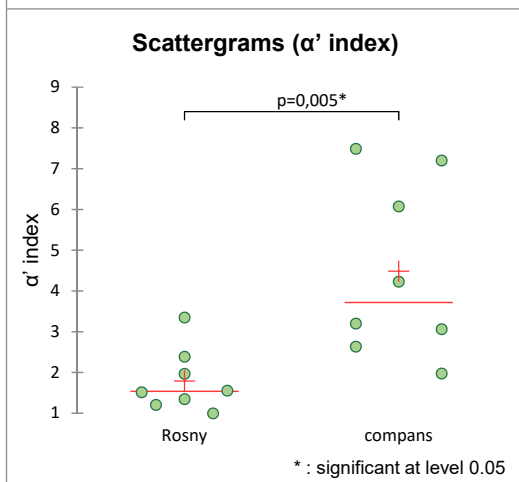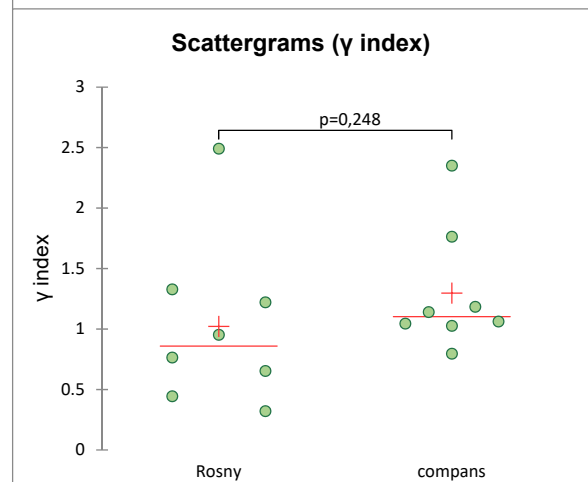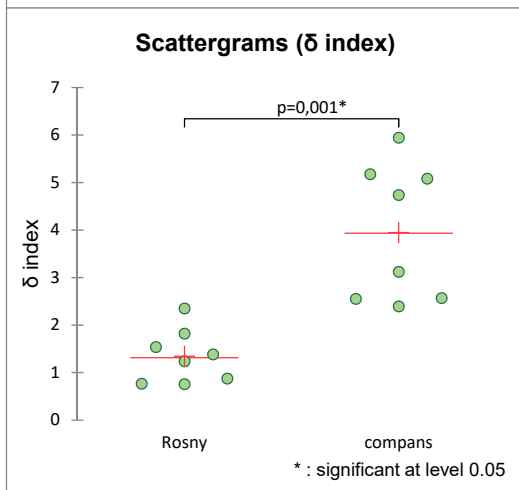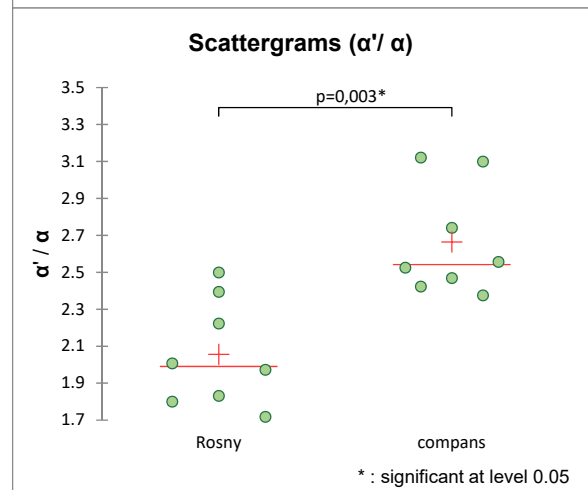

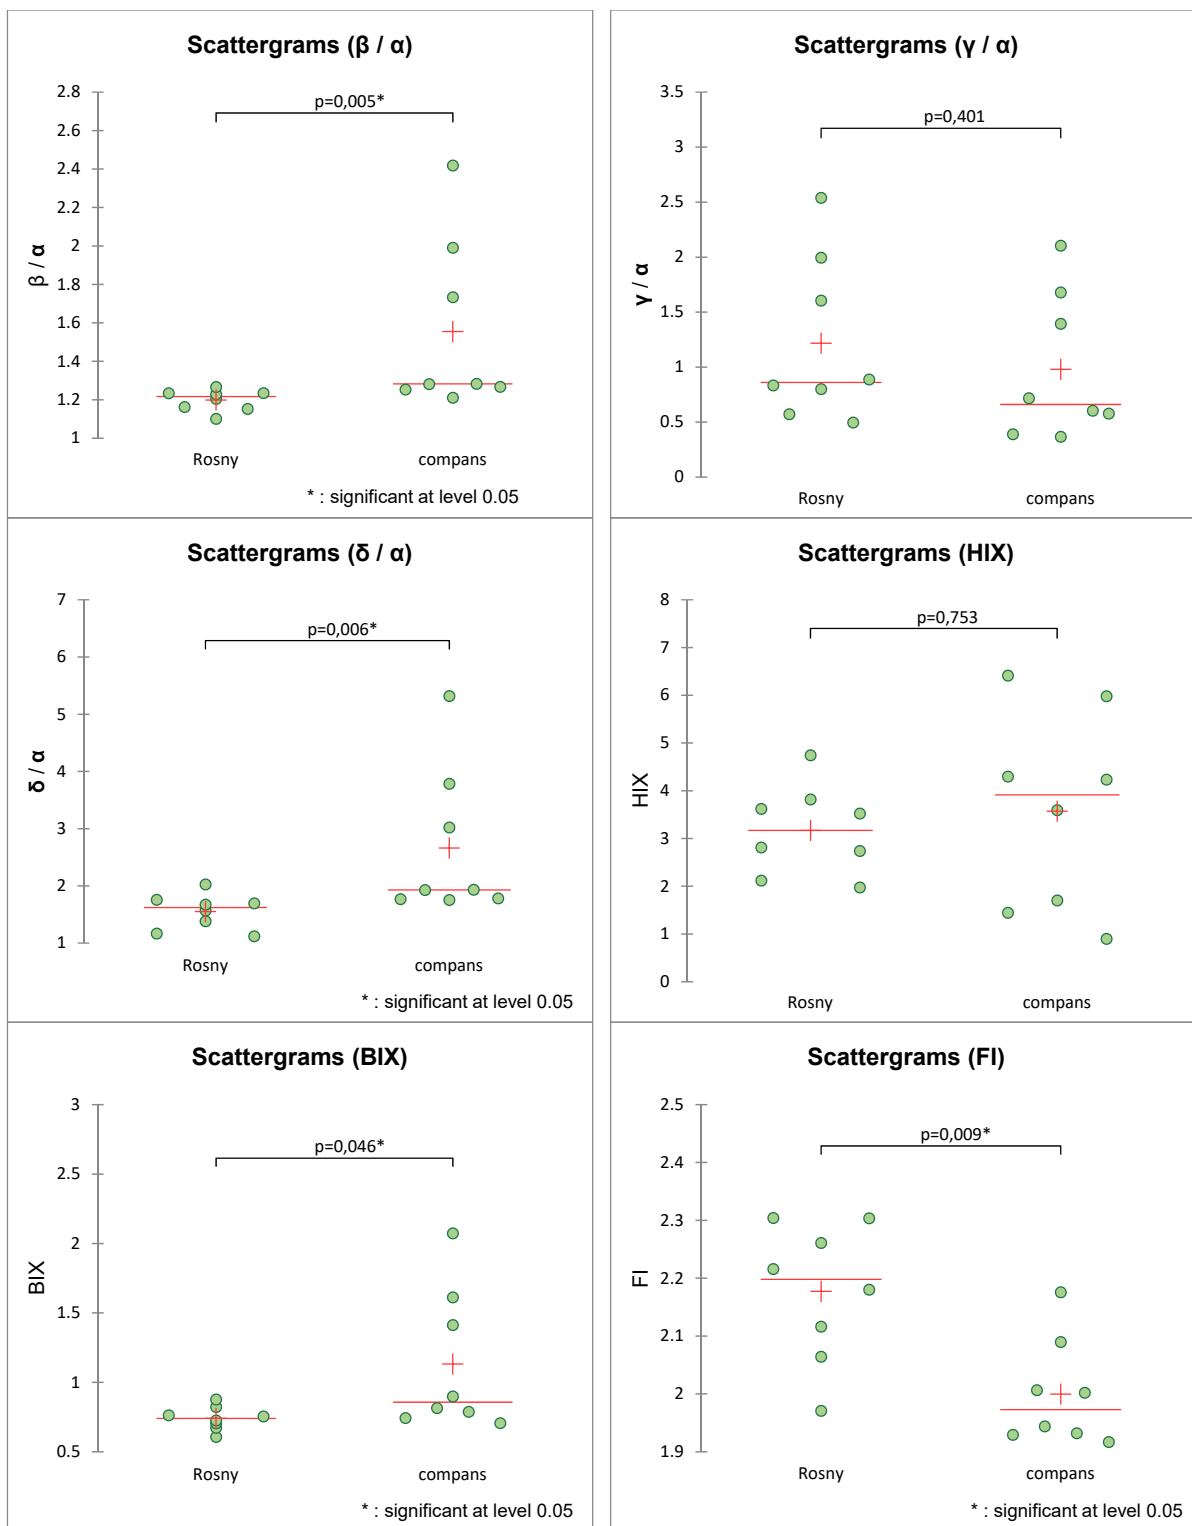

**Figure S1.** 3D fluorescence indexes for all road runoff samples collected from the two sites.  $\alpha$ ,  $\alpha'$ ,  $\beta$  indexes related to humic-like components and  $\gamma$  and  $\delta$  indexes related to protein-like components were obtained at specific pairs of Ex/Em (excitation/emission) wavelengths from measured excitation-emission matrices [44]. HIX = humification index, BIX = biological index, FI = fluorescence index.

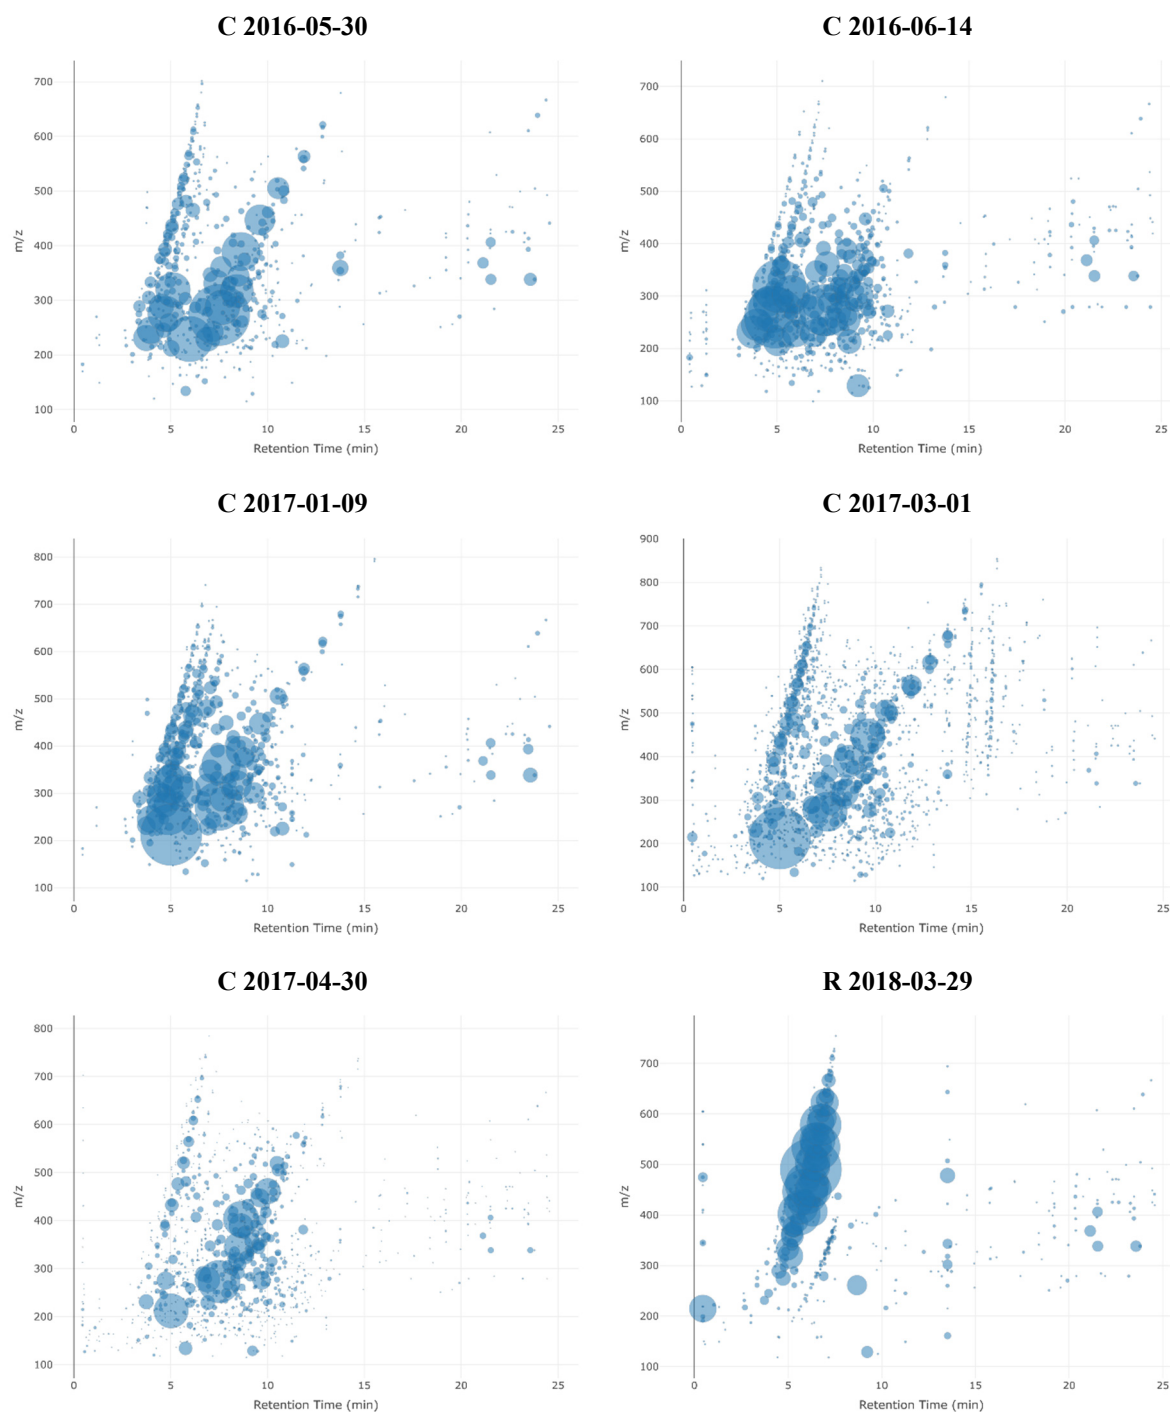

**Figure S2.** HRMS fingerprints of road runoff samples (C = Compans, R = Rosny-sous-Bois). The size of bubbles is proportional to the intensity of the feature, and intensities are normalized by the highest intensity of each sample (i.e., all fingerprints get the same range of intensities).

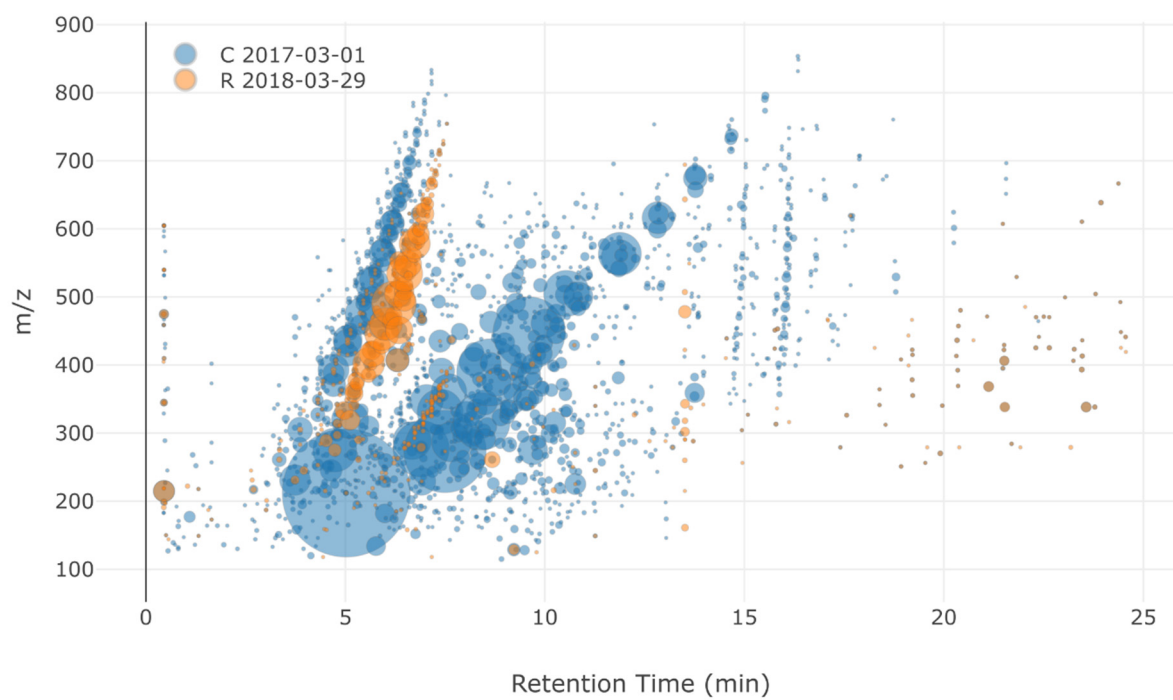

**Figure S3.** HRMS fingerprints of road runoff samples (C = Compans, R = Rosny-sous-Bois); comparison between C 2017-03-01 and R 2018-03-29 samples. The size of bubbles is proportional to the intensity of the feature.

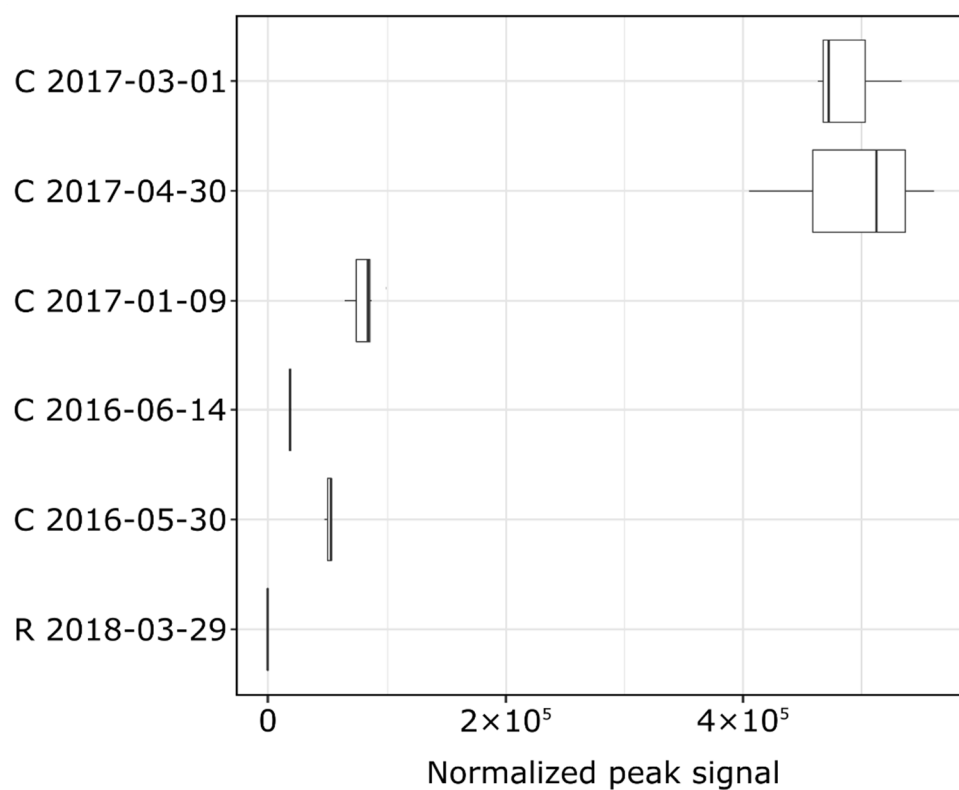

**Figure S4.** Boxplots representing the intensities of benzotriazole in each sample (triplicate injections in ESI+ mode). C = Compans; R = Rosny.

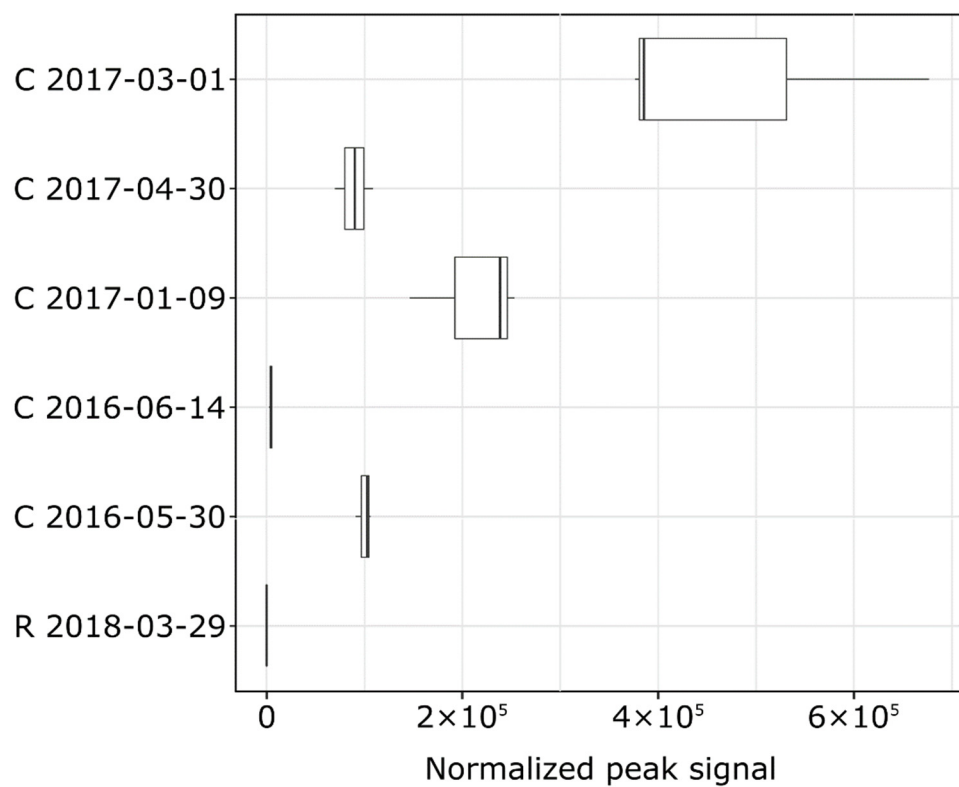

**Figure S5.** Boxplots representing the intensities of 1,3-benzothiazole-2-sulfonic acid in each sample (triplicate injections in ESI- mode). C = Compans; R = Rosny.

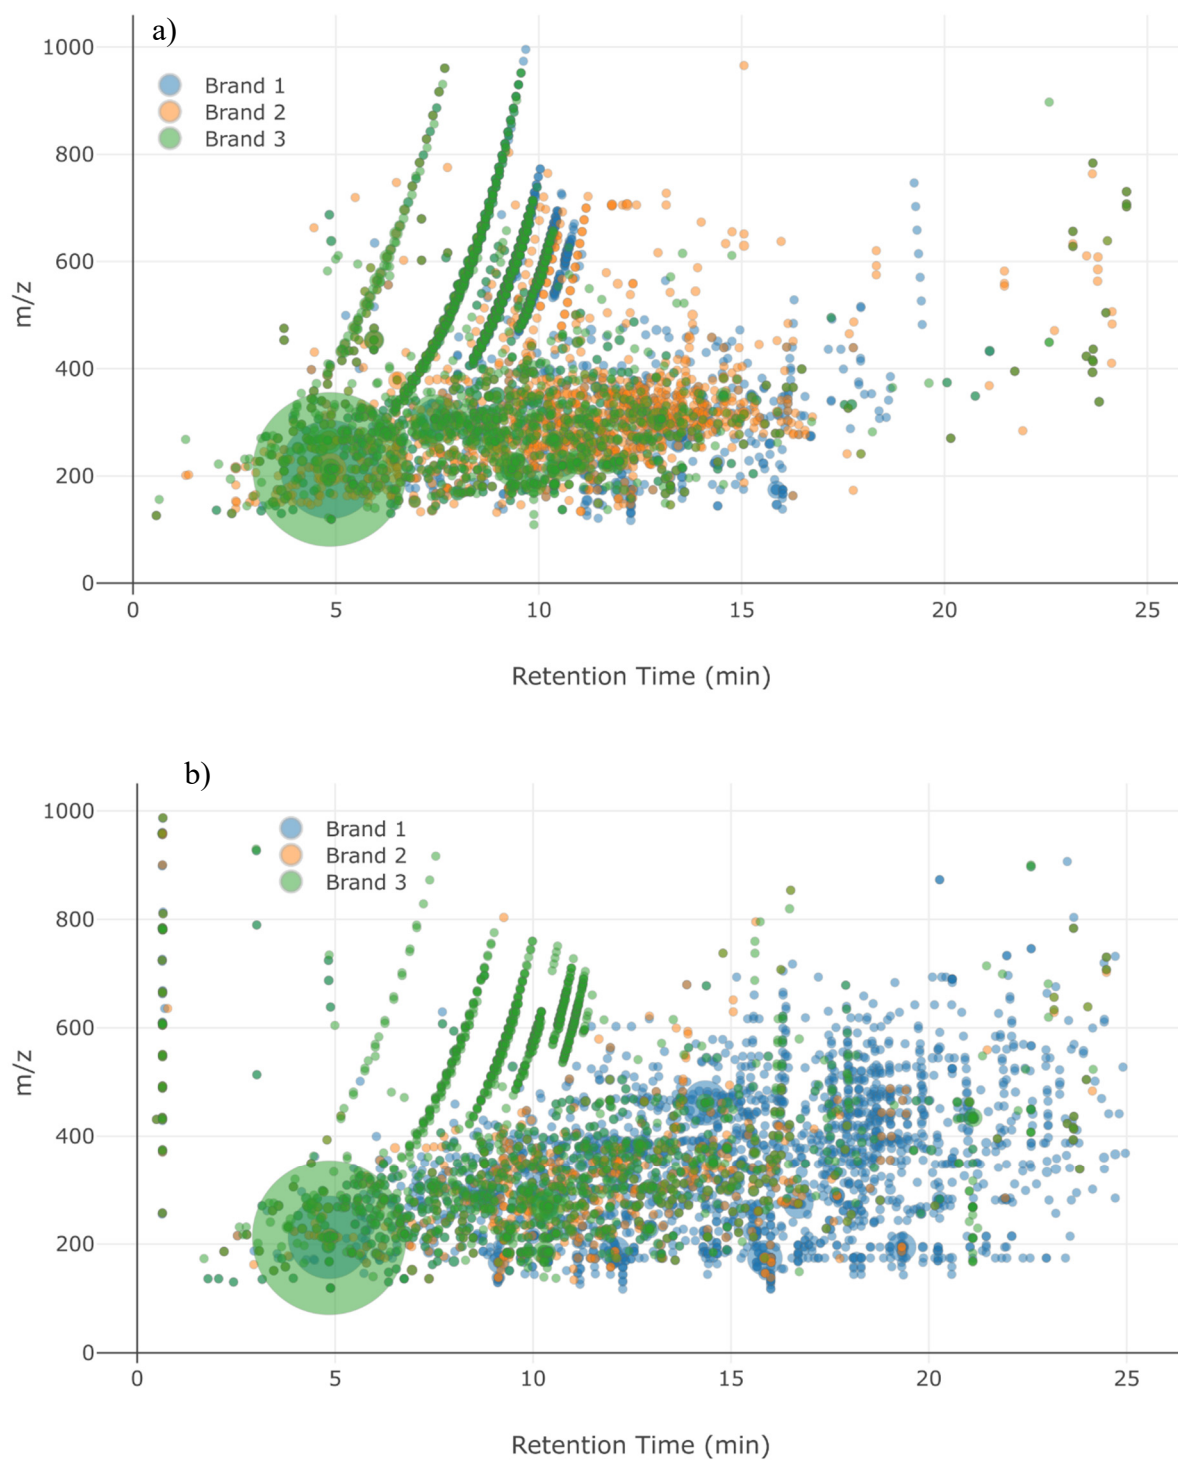

**Figure S6.** HRMS fingerprints of tire leachates (features with intensity values higher than 6000), obtained with **a)** simulated rainwater and **b)** methanol. The size of bubbles is proportional to the area of the feature.

**Table S1.** Specific features tentatively identified by non-target screening at each site.

| Molecular formula                                             | Adduct | Observed m/z | Observed RT (min) | Observed CCS (Å <sup>2</sup> ) | Mass error (ppm) | I-fit confidence (%) <sup>1</sup> | Possible structure                                    | Site <sup>2</sup> |
|---------------------------------------------------------------|--------|--------------|-------------------|--------------------------------|------------------|-----------------------------------|-------------------------------------------------------|-------------------|
| C <sub>9</sub> H <sub>19</sub> NO <sub>4</sub> S              | -H     | 236.0963     | 7.81              | 158.08                         | 0.5              | 99.99                             | -                                                     | C                 |
| C <sub>9</sub> H <sub>12</sub> O <sub>3</sub> S               | -H     | 199.0437     | 6.11              | 147.55                         | 0.3              | 99.99                             | -                                                     | C                 |
| C <sub>7</sub> H <sub>5</sub> NO <sub>3</sub> S <sub>2</sub>  | -H     | 213.9642     | 4.36              | 139.23                         | 1.7              | 99.99                             | 1,3-benzothiazole-2-sulfonic acid                     | C                 |
| C <sub>12</sub> H <sub>23</sub> N                             | +H     | 182.1897     | 5.98              | 142.21                         | -3.3             | 99.99                             | Dicyclohexylamine                                     | C                 |
| C <sub>13</sub> H <sub>13</sub> N <sub>3</sub>                | +H     | 212.1178     | 5.02              | 143.5                          | -1.4             | 99.99                             | 1,3-diphenylguanidine                                 | C                 |
| C <sub>14</sub> H <sub>26</sub> N <sub>2</sub> O <sub>2</sub> | +H     | 277.1904     | 6.89              | 164.2                          | -2.5             | 99.94                             | 4-[(2,2-Dimethylpropanoyl)amino]-N,N-diethylbenzamide | C                 |
| C <sub>12</sub> H <sub>26</sub> O <sub>5</sub>                | +Na    | 273.1667     | 7.43              | 153.41                         | -2.2             | 99.91                             | Tetrapropylene glycol                                 | C                 |
| C <sub>12</sub> H <sub>24</sub> O <sub>6</sub>                | +Na    | 287.146      | 7.65              | 155.82                         | -1.9             | 99.59                             | (18-Crown-6) (no fragments)                           | C                 |
| C <sub>14</sub> H <sub>30</sub> O <sub>8</sub>                | +Na    | 349.1827     | 4.31              | 162.93                         | -2               | 97.21                             | Heptaethylene glycol                                  | C                 |
| C <sub>16</sub> H <sub>34</sub> O <sub>9</sub>                | +Na    | 393.2093     | 4.70              | 172.47                         | -0.7             | 97.52                             | Octaethylene glycol                                   | C                 |
| C <sub>18</sub> H <sub>38</sub> O <sub>10</sub>               | +Na    | 437.2353     | 5.05              | 182.48                         | -0.3             | 99.22                             | Nonaeethylene glycol                                  | C                 |
| C <sub>20</sub> H <sub>42</sub> O <sub>11</sub>               | +Na    | 481.2616     | 5.37              | 191.95                         | -0.7             | 90.97                             | Decaethylene glycol                                   | C                 |
| C <sub>22</sub> H <sub>46</sub> O <sub>12</sub>               | +Na    | 525.2876     | 5.66              | 203.20                         | -1               | 99.65                             | Undecaethylene glycol                                 | C                 |
| C <sub>24</sub> H <sub>50</sub> O <sub>13</sub>               | +Na    | 569.3139     | 5.92              | 213.33                         | -0.9             | 95.33                             | Dodecaethylene glycol                                 | C                 |
| C <sub>26</sub> H <sub>54</sub> O <sub>14</sub>               | +Na    | 613.3405     | 6.17              | 223.38                         | -0.1             | 95.23                             | PEG13                                                 | C                 |
| C <sub>28</sub> H <sub>58</sub> O <sub>15</sub>               | +Na    | 657.3668     | 6.39              | 233.01                         | 0.1              | 99.59                             | PEG14                                                 | C                 |
| C <sub>30</sub> H <sub>62</sub> O <sub>16</sub>               | +Na    | 701.3935     | 6.59              | 243.83                         | 0.9              | 0.61                              | PEG15                                                 | C                 |
| C <sub>32</sub> H <sub>66</sub> O <sub>17</sub>               | +Na    | 745.4206     | 6.79              | 253.21                         | 1.9              | 0                                 | PEG16                                                 | C                 |
| C <sub>13</sub> H <sub>31</sub> N <sub>5</sub> O <sub>4</sub> | +Na    | 344.2275     | 4.31              | 170.46                         | 2.1              | 86.13                             | -                                                     | C                 |
| C <sub>15</sub> H <sub>35</sub> N <sub>5</sub> O <sub>5</sub> | +Na    | 388.2538     | 4.70              | 179.11                         | 2.2              | 87.16                             | -                                                     | C                 |
| C <sub>17</sub> H <sub>39</sub> N <sub>5</sub> O <sub>6</sub> | +Na    | 432.2801     | 5.05              | 188.00                         | 2.1              | 94.85                             | -                                                     | C                 |
| C <sub>19</sub> H <sub>43</sub> N <sub>5</sub> O <sub>7</sub> | +Na    | 476.3061     | 5.37              | 197.14                         | 1.5              | 99.43                             | -                                                     | C                 |



|                                                                                                                                     |     |          |       |        |       |                                    |                                          |   |
|-------------------------------------------------------------------------------------------------------------------------------------|-----|----------|-------|--------|-------|------------------------------------|------------------------------------------|---|
| C <sub>21</sub> H <sub>47</sub> N <sub>5</sub> O <sub>8</sub>                                                                       | +Na | 520.3324 | 5.66  | 205.99 | 1.5   | 95.87                              | -                                        | C |
| C <sub>23</sub> H <sub>51</sub> N <sub>5</sub> O <sub>9</sub>                                                                       | +Na | 564.3585 | 5.92  | 215.25 | 1.1   | 97.83                              | -                                        | C |
| C <sub>25</sub> H <sub>55</sub> N <sub>5</sub> O <sub>10</sub>                                                                      | +Na | 608.3851 | 6.16  | 225.5  | 1.6   | 55.14                              | -                                        | C |
| C <sub>27</sub> H <sub>59</sub> N <sub>5</sub> O <sub>11</sub>                                                                      | +Na | 652.4115 | 6.39  | 235.04 | 1.9   | 78.51                              | -                                        | C |
| C <sub>29</sub> H <sub>63</sub> N <sub>5</sub> O <sub>12</sub>                                                                      | +Na | 696.4379 | 6.59  | 246.28 | 2.1   | 91.27                              | -                                        | C |
| C <sub>31</sub> H <sub>67</sub> N <sub>5</sub> O <sub>13</sub>                                                                      | +Na | 740.4649 | 6.79  | 255.73 | -0.5  | NA<br>(formula<br>not<br>proposed) | -                                        | C |
| C <sub>33</sub> H <sub>71</sub> N <sub>5</sub> O <sub>14</sub>                                                                      | +Na | 784.4906 | 6.97  | 265.71 | 2.1   | 0.08                               | -                                        | C |
| -                                                                                                                                   | +Na | 563.3766 | 11.80 | 218.06 | -     | -                                  | -                                        | C |
| C <sub>28</sub> H <sub>59</sub> FN <sub>4</sub> O <sub>8</sub>                                                                      | +Na | 621.4189 | 12.80 | 231.15 | -3.3  | 97.2                               | -                                        | C |
| -                                                                                                                                   | +Na | 679.4607 | 13.78 | 245.63 | -     | -                                  | -                                        | C |
| -                                                                                                                                   | +Na | 737.5031 | 14.70 | 260.70 | -     | -                                  | -                                        | C |
| -                                                                                                                                   | +Na | 795.5445 | 15.57 | 273.57 | -     | -                                  | -                                        | C |
| C <sub>17</sub> H <sub>36</sub> N <sub>4</sub> O <sub>3</sub>                                                                       | +Na | 367.2685 | 8.60  | 178.70 | 1.5   | 78.46                              | -                                        | C |
| C <sub>20</sub> H <sub>42</sub> N <sub>4</sub> O <sub>4</sub>                                                                       | +Na | 425.3106 | 9.71  | 192.36 | 1.9   | 34.5                               | -                                        | C |
| C <sub>23</sub> H <sub>48</sub> N <sub>4</sub> O <sub>5</sub>                                                                       | +Na | 483.3525 | 10.82 | 205.17 | 1.7   | 3.3                                | -                                        | C |
| C <sub>22</sub> H <sub>50</sub> F <sub>4</sub> N <sub>8</sub> O<br>(C <sub>26</sub> H <sub>54</sub> N <sub>4</sub> O <sub>6</sub> ) | +Na | 541.3947 | 11.85 | 217.17 | 2.2   | 86.1                               | -                                        | C |
| C <sub>29</sub> H <sub>60</sub> N <sub>4</sub> O <sub>7</sub>                                                                       | +Na | 599.4369 | 12.81 | 230.30 | 2.5   | 0.9                                | -                                        | C |
| -                                                                                                                                   | +Na | 657.4789 | 13.77 | 244.12 | -     | -                                  | -                                        | C |
| C <sub>6</sub> H <sub>9</sub> F <sub>3</sub> O <sub>3</sub>                                                                         | +H  | 187.0568 | 1.57  | 124.71 | -4.4  | 96.29                              | Ethyl 4,4,4-trifluoro-3-hydroxybutanoate | R |
| C <sub>12</sub> H <sub>24</sub> F <sub>2</sub> O <sub>2</sub>                                                                       | +Na | 261.1635 | 5.34  | 153.73 | -0.74 | 99.99                              | 1-(2,2-Difluoroethoxy)-                  | R |

|                                                               |     |          |      |        |      |       |                                        |   |
|---------------------------------------------------------------|-----|----------|------|--------|------|-------|----------------------------------------|---|
|                                                               |     |          |      |        |      |       | 3-decanol                              |   |
| C <sub>22</sub> H <sub>46</sub> N <sub>4</sub> O <sub>8</sub> | +Na | 517.3219 | 6.49 | 209.37 | 2.3  | 51.21 | -                                      | R |
| C <sub>9</sub> H <sub>20</sub> O <sub>5</sub>                 | +Na | 213.12   | 3.75 | 138.49 | -1.2 | 99.99 | Tetraethylene Glycol Monomethyl Ether  | R |
| C <sub>11</sub> H <sub>24</sub> O <sub>6</sub>                | +Na | 275.1462 | 4.32 | 146.51 | -1.3 | 99.99 | Pentaethylene Glycol Monomethyl Ether  | R |
| C <sub>13</sub> H <sub>28</sub> O <sub>7</sub>                | +Na | 319.1725 | 4.80 | 154.71 | -0.6 | 99.92 | Hexaethylene Glycol Monomethyl Ether   | R |
| C <sub>15</sub> H <sub>32</sub> O <sub>8</sub>                | +Na | 363.1984 | 5.23 | 164.85 | -1.5 | 99.56 | Heptaethylene Glycol Monomethyl Ether  | R |
| C <sub>17</sub> H <sub>36</sub> O <sub>9</sub>                | +Na | 407.2250 | 5.59 | 174.78 | -0.4 | 98.38 | Octaethylene Glycol Monomethyl Ether   | R |
| C <sub>19</sub> H <sub>40</sub> O <sub>10</sub>               | +Na | 451.2516 | 5.93 | 186.25 | 0.6  | 97.00 | Nonaethylene Glycol Monomethyl Ether   | R |
| C <sub>21</sub> H <sub>44</sub> O <sub>11</sub>               | +Na | 495.2775 | 6.23 | 198.07 | -0.8 | 97.78 | Decaethylene Glycol Monomethyl Ether   | R |
| C <sub>23</sub> H <sub>48</sub> O <sub>12</sub>               | +Na | 539.3038 | 6.49 | 209.20 | -0.1 | 32.84 | Undecaethylene Glycol Monomethyl Ether | R |
| C <sub>25</sub> H <sub>52</sub> O <sub>13</sub>               | +Na | 583.3295 | 6.74 | 218.75 | -0.9 | 94.11 | Dodecaethylene Glycol Monomethyl Ether | R |
| C <sub>27</sub> H <sub>56</sub> O <sub>14</sub>               | +Na | 627.3566 | 6.96 | 228.69 | 0.6  | 93.44 | mPEG13-OH                              | R |
| C <sub>29</sub> H <sub>60</sub> O <sub>15</sub>               | +Na | 671.3830 | 7.17 | 238.75 | 0.8  | 0.1   | mPEG14-OH                              | R |
| C <sub>31</sub> H <sub>64</sub> O <sub>16</sub>               | +Na | 715.4092 | 7.36 | 249.55 | 1.6  | 0.8   | mPEG15-OH                              | R |
| C <sub>10</sub> H <sub>20</sub> N <sub>4</sub> O <sub>3</sub> | +Na | 267.1433 | 4.39 | 148.82 | 2.5  | 94.2  | -                                      | R |
| C <sub>12</sub> H <sub>24</sub> N <sub>4</sub> O <sub>4</sub> | +Na | 311.1696 | 4.89 | 158.71 | 2.1  | 79.7  | -                                      | R |
| C <sub>14</sub> H <sub>28</sub> N <sub>4</sub> O <sub>5</sub> | +Na | 355.1956 | 5.31 | 165.48 | 1.2  | 96.7  | -                                      | R |
| C <sub>16</sub> H <sub>32</sub> N <sub>4</sub> O <sub>6</sub> | +Na | 399.2223 | 5.69 | 176.04 | 1.9  | 78.7  | -                                      | R |
| C <sub>18</sub> H <sub>36</sub> N <sub>4</sub> O <sub>7</sub> | +Na | 443.2486 | 6.03 | 188.4  | 2.4  | 69.0  | -                                      | R |
| C <sub>20</sub> H <sub>40</sub> N <sub>4</sub> O <sub>8</sub> | +Na | 487.2746 | 6.32 | 199.76 | 1.8  | 96.6  | -                                      | R |

|                                                                |     |          |      |        |      |       |   |   |
|----------------------------------------------------------------|-----|----------|------|--------|------|-------|---|---|
| C <sub>22</sub> H <sub>44</sub> N <sub>4</sub> O <sub>9</sub>  | +Na | 531.3012 | 6.59 | 209.36 | 2.2  | 90.9  | - | R |
| C <sub>24</sub> H <sub>48</sub> N <sub>4</sub> O <sub>10</sub> | +Na | 575.3276 | 6.84 | 218.72 | 2.5  | 40.9  | - | R |
| C <sub>26</sub> H <sub>52</sub> N <sub>4</sub> O <sub>11</sub> | +Na | 619.3533 | 7.06 | 228.16 | -2.8 | 32.2  | - | R |
| C <sub>10</sub> H <sub>25</sub> N <sub>5</sub> O <sub>2</sub>  | +Na | 270.1907 | 4.32 | 154.65 | 2.5  | 99.99 | - | R |
| C <sub>12</sub> H <sub>29</sub> N <sub>5</sub> O <sub>3</sub>  | +Na | 314.2170 | 4.81 | 163.3  | 2.4  | 98.65 | - | R |
| C <sub>14</sub> H <sub>33</sub> N <sub>5</sub> O <sub>4</sub>  | +Na | 358.2430 | 5.20 | 173.24 | 1.7  | 93.3  | - | R |
| C <sub>16</sub> H <sub>35</sub> N <sub>5</sub> O <sub>5</sub>  | +Na | 402.2696 | 5.60 | 181.29 | 2.4  | 58.5  | - | R |
| C <sub>18</sub> H <sub>41</sub> N <sub>5</sub> O <sub>6</sub>  | +Na | 446.2963 | 5.93 | 191.06 | 3.3  | 42.48 | - | R |
| C <sub>20</sub> H <sub>45</sub> N <sub>5</sub> O <sub>7</sub>  | +Na | 490.3321 | 6.23 | 200.39 | 2.1  | 79.17 | - | R |
| C <sub>22</sub> H <sub>49</sub> N <sub>5</sub> O <sub>8</sub>  | +Na | 534.3485 | 6.49 | 210.52 | 2.2  | 66.4  | - | R |
| C <sub>24</sub> H <sub>53</sub> N <sub>5</sub> O <sub>9</sub>  | +Na | 578.3743 | 6.74 | 220.73 | 1.4  | 59.01 | - | R |
| C <sub>26</sub> H <sub>57</sub> N <sub>5</sub> O <sub>10</sub> | +Na | 622.4012 | 6.96 | 231.44 | 2.3  | 22.6  | - | R |
| C <sub>28</sub> H <sub>61</sub> N <sub>5</sub> O <sub>11</sub> | +Na | 666.4274 | 7.17 | 241.66 | 2.2  | 97.4  | - | R |
| C <sub>30</sub> H <sub>65</sub> N <sub>5</sub> O <sub>12</sub> | +Na | 710.4535 | 7.36 | 252.33 | 1.9  | 1.6   | - | R |

<sup>1</sup> The I-fit confidence percentage is a score giving the confidence of the proposed formula regarding isotopes measured for the feature.

<sup>2</sup> C: Compans, R: Rosny.

**Table S2.** Features tentatively identified by non-target screening in the tire leachates

| Molecular formula                                              | Adduct | Observed m/z | Observed RT (min) | Observed CCS (Å <sup>2</sup> ) | Mass error (ppm) | I-fit confidence (%) <sub>1</sub> | Possible structure                                         | Also detected in site C |
|----------------------------------------------------------------|--------|--------------|-------------------|--------------------------------|------------------|-----------------------------------|------------------------------------------------------------|-------------------------|
| C <sub>13</sub> H <sub>13</sub> N <sub>3</sub>                 | +H     | 212.1178     | 5.02              | 143.50                         | -1.4             | 99.99                             | 1,3-diphenylguanidine                                      | x                       |
| C <sub>18</sub> H <sub>24</sub> N <sub>2</sub>                 | +H     | 269.2001     | 10.37             | 219.83                         | -4.1             | 97.42                             | N-(1,3-dimethylbutyl)-N'-phenyl-p-phenylenediamine (6PPD)  | x                       |
| C <sub>12</sub> H <sub>15</sub> N                              | +H     | 174.1271     | 12.28             | 170.54                         | -3.5             | 99.99                             | 2-Phenylhexanenitrile                                      |                         |
| C <sub>13</sub> H <sub>12</sub> N <sub>2</sub> O               | +H     | 213.1015     | 9.34              | 186.56                         | -2.5             | 99.40                             | 4-[(2-Phenylhydrazono)methyl]phenol                        | x                       |
| C <sub>13</sub> H <sub>19</sub> N <sub>3</sub>                 | +H     | 218.1645     | 6.72              | 192.91                         | -3.2             | 99.55                             | 4-(4-Cyclopropyl-1-piperazinyl)aniline                     | x                       |
| C <sub>13</sub> H <sub>18</sub> N <sub>2</sub> O               | +H     | 219.1486     | 10.57             | 191.49                         | -2.1             | 99.92                             | 2-Amino-N-cyclohexylbenzamide                              | x                       |
| C <sub>13</sub> H <sub>10</sub> N <sub>2</sub> S               | +H     | 227.0631     | 12.98             | 183.20                         | -1.2             | 99.45                             | 2-mercapto-6-methyl-4-phenylnicotinonitrile                | x                       |
| C <sub>18</sub> H <sub>25</sub> NO                             | +H     | 272.2002     | 13.54             | 215.49                         | -2.6             | 97.99                             | (E)-8-(1H-Indol-1-yl)-2,6-dimethyloct-7-en-2-ol            |                         |
| C <sub>19</sub> H <sub>23</sub> N <sub>3</sub>                 | +H     | 294.1956     | 9.83              | 222.56                         | -2.9             | 99.87                             | N-Cyclohexyl-N'-(4-(dimethylamino)naphthyl)carbodiimide    | x                       |
| C <sub>19</sub> H <sub>19</sub> N <sub>3</sub> O               | +H     | 306.1599     | 7.45              | 219.82                         | -2.1             | 99.98                             | [2-(1H-Benzimidazol-2-yl)phenyl](1-piperidinyl)methanone   |                         |
| C <sub>19</sub> H <sub>14</sub> N <sub>2</sub> OS <sub>2</sub> | +H     | 351.0611     | 14.55             | 229.08                         | -1.5             | 70.30                             | Ethanone, 2-(1-phenyl-2-benzimidazolylthio)-1-(2-thienyl)- |                         |
| C <sub>24</sub> H <sub>27</sub> NO <sub>3</sub>                | +H     | 378.2059     | 6.47              | 233.89                         | -1.2             | 96.56                             | -                                                          |                         |
